# Supplementary material for: Towards accurate and scalable high-throughput MOF adsorption screening: merging classical force fields and universal machine learned interatomic potentials
Source: Royal Society of Chemistry journal article supplement (doi:10.1039/d6sc00831c), 2026-05-05
Supplement: d6sc00831c1.pdf [file d6sc00831c1.pdf]

## Supplementary Information

### **Towards Accurate and Scalable High-throughput MOF Adsorption Screening: Merging Classical Force Fields and Universal Machine Learned Interatomic Potentials**

Satyanarayana Bonakala<sup>a</sup>, Mohammad Wahiduzzaman<sup>a</sup>, Taku Watanabe<sup>b</sup>, Karim Hamzaoui<sup>b</sup>, and Guillaume Maurin<sup>a,c\*</sup>

<sup>a</sup>ICGM, Univ. Montpellier, CNRS, ENSCM, 34293 Montpellier, France

<sup>b</sup>Matlantis Corporation, Otemachi, Chiyoda-ku, 100-0004 Tokyo, Japan

<sup>c</sup>Institut Universitaire de France, 75005 Paris, France

*Email:* guillaume.maurin1@umontpellier.fr

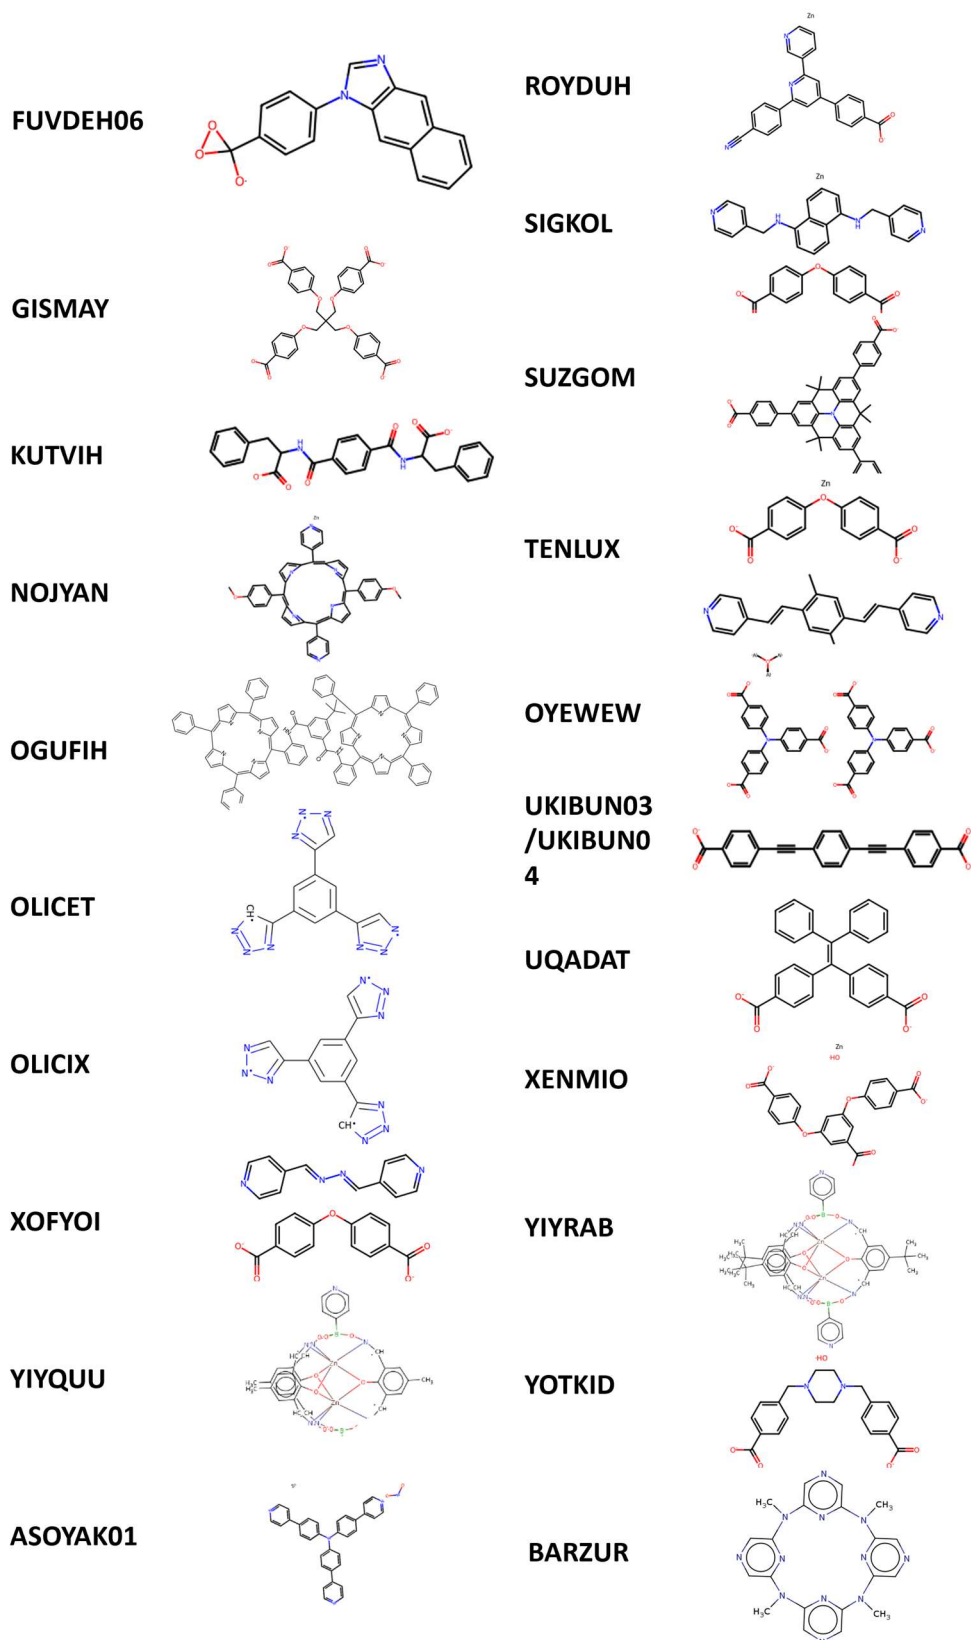

**Fig. S1** CSD refcodes and corresponding linker structures of MOFs evaluated during the synthetic feasibility assessment. The left column lists the MOF CSD refcodes, while the right column illustrates the associated organic linker molecules extracted using the MOFid toolkit. These linkers were analyzed for complexity, and synthetic accessibility.

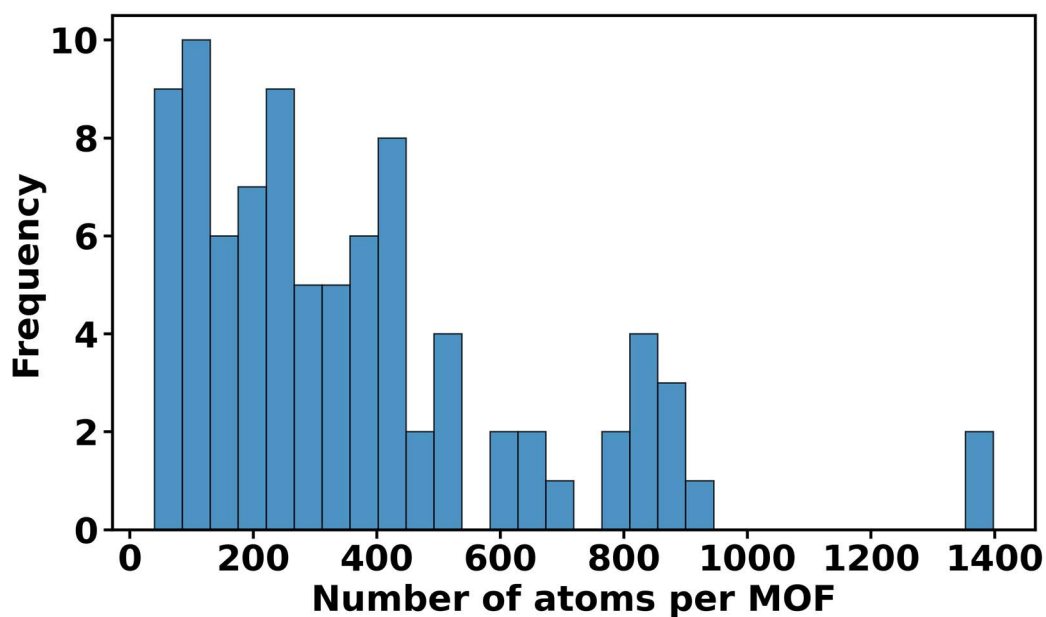

**Fig. S2** Distribution of the number of atoms per MOF in the benchmarking dataset of 88 structures.

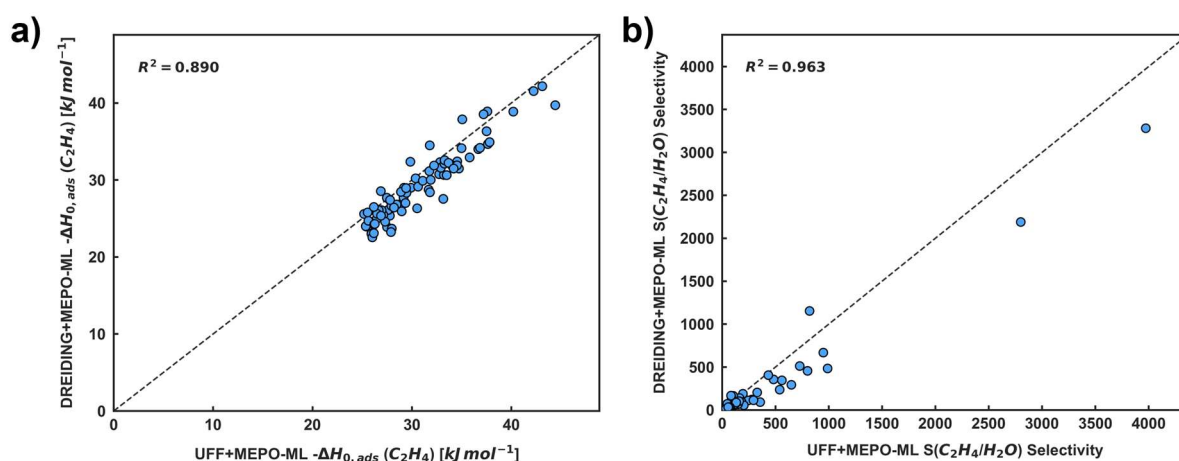

**Fig. S3. Comparison of ethylene adsorption performance predicted using UFF- and DREIDING-based workflows.** Parity plots showing the correlation between **(a)** ethylene adsorption enthalpy ( $-\Delta H_{0,ads}(C_2H_4)$ ) and **(b)** ideal  $S(C_2H_4/H_2O)$  selectivity across the 88 MOF subset. Both workflows utilize the same MEPO-ML charges for electrostatic interactions. The high  $R^2$  values (0.89 and 0.96, respectively).

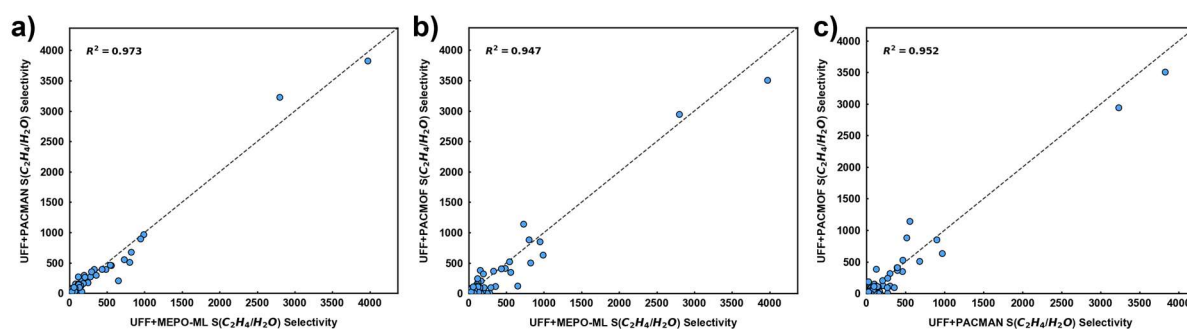

**Fig. S4.** Comparison of ideal  $S(\text{C}_2\text{H}_4/\text{H}_2\text{O})$  selectivity using different ML-based partial charges. Parity plots showing the correlation of ideal ethylene/water selectivity calculated using UFF paired with three different ML charge schemes for the 88 MOF subset: (a) PACMAN vs. MEPO-ML charges, (b) PACMOF vs. MEPO-ML charges, and (c) PACMOF vs. PACMAN charges.

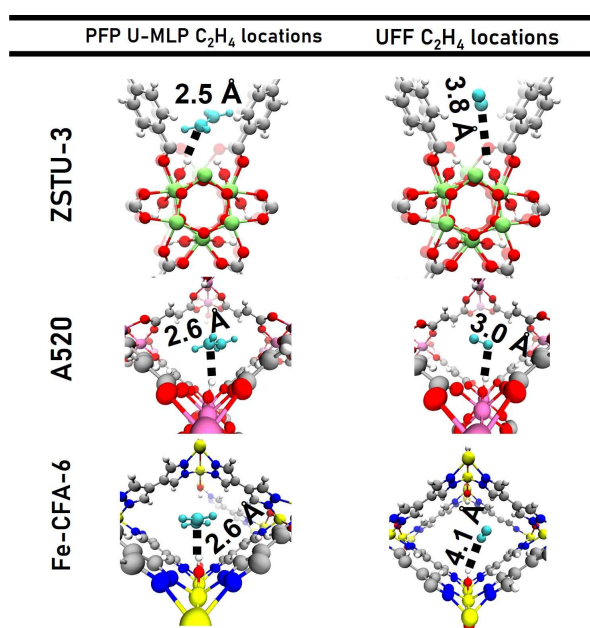

**Fig. S5.** Ethylene (cyan) adsorption configurations in three outlier MOFs (red crosses in Figure 4e of the main text), comparing predictions from PFP u-MLIP (left) and UFF (right). Distances indicate the shortest framework–ethylene contacts, highlighting the stronger binding geometries captured by PFP u-MLIP compared to UFF. Ethylene hydrogen atoms are omitted in FF simulations as it is described with Fisher et al.,<sup>1</sup> united-atom model.

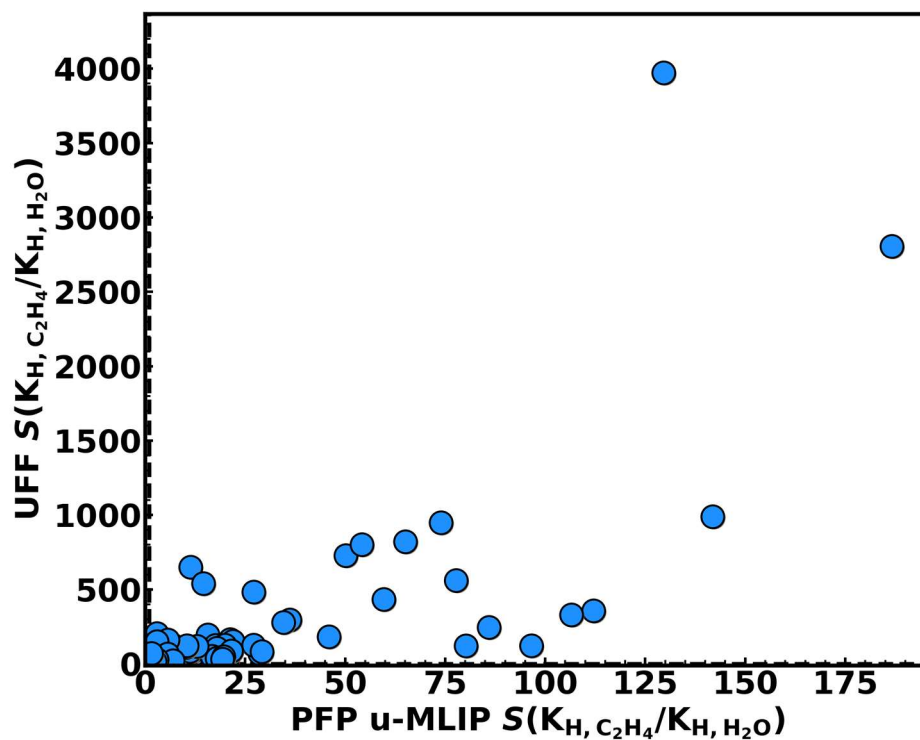

**Fig. S6.** Comparison of ethylene/water ideal selectivity  $S(C_2H_4/H_2O) = K_{H, C_2H_4}/K_{H, H_2O}$ , predicted from UFF and PFP u-MLIP Widom insertion simulations for the identified 88 MOF subset. Each point represents one MOF. Dashed lines indicate  $S(C_2H_4/H_2O) = 1$ .

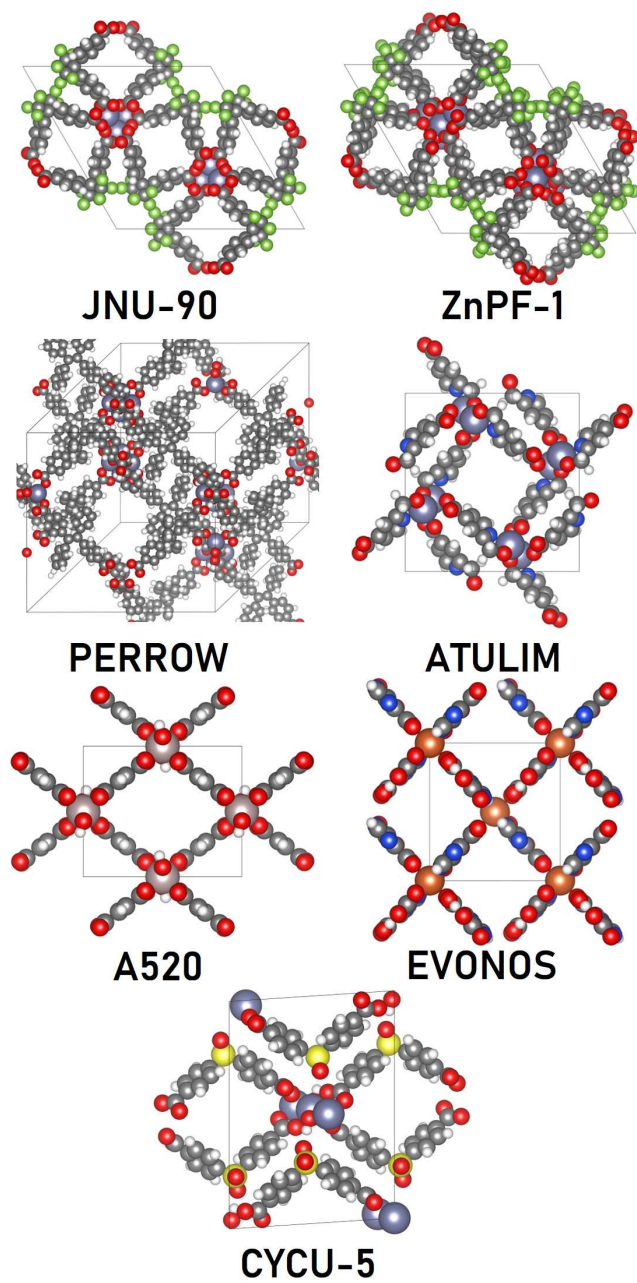

**Fig. S7.** Crystal structures of selected top-performing MOFs identified in Figure 4f.

**Table S1.** Comparison of calculated ethylene adsorption enthalpies ( $-\Delta H_{0,ads}(C_2H_4)$ ) with experimental isosteric heat of adsorption ( $Q_{st}$ ) values reported in the literature.

| MOF                               | $-\Delta H_{0,ads}(C_2H_4)$ (kJ·mol <sup>-1</sup> ) | Experimental $Q_{st}$ (kJ·mol <sup>-1</sup> ) |
|-----------------------------------|-----------------------------------------------------|-----------------------------------------------|
| A520                              | 32.7                                                | 30.50 <sup>2</sup>                            |
| MIL-53ht (Al)                     | 26.1                                                | 30.50 <sup>3</sup>                            |
| Zn <sub>3</sub> (Im) <sub>6</sub> | 31.7                                                | 27.66 <sup>4</sup>                            |
| Zn(hba)                           | 29.2                                                | 26.10 <sup>5</sup>                            |

**Table S2.** Adsorption enthalpy and volume variations of the seven top-performing MOFs identified in Figure 4f. Shown are the differences in ethylene adsorption enthalpies ( $\Delta(\Delta H_{0,ads}(C_2H_4))$ ) between rigid and cell-optimized MOF structures, together with the corresponding percentage volume change ( $\Delta V\%$ ).  $\Delta(\Delta H_{0,ads}(C_2H_4))$  is defined as  $\Delta H_{0,ads}(C_2H_4)$  of the rigid MOF minus  $\Delta H_{0,ads}(C_2H_4)$  of the cell-optimized MOF.  $\Delta V\%$  is calculated as:  $\Delta V\% = (V(\text{rigid MOF}) - V(\text{cell-optimized MOF})) \times 100 / V(\text{rigid MOF})$

| MOF    | $\Delta(\Delta H_{0,ads}(C_2H_4))$ (kJ·mol <sup>-1</sup> ) | $\Delta V\%$ |
|--------|------------------------------------------------------------|--------------|
| JNU-90 | -0.32                                                      | -2.2         |
| ZnPF-1 | -1.88                                                      | -4.3         |
| PERROW | 0.68                                                       | 0.2          |
| ATULIM | -0.23                                                      | -1.6         |
| A520   | -0.39                                                      | 19           |
| EVONOS | -4.13                                                      | 2.2          |
| CYCU-5 | -0.49                                                      | 1.5          |

**ATULIM\_full**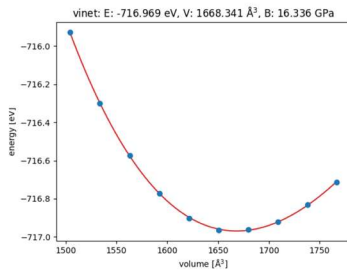**AVIMIC\_full**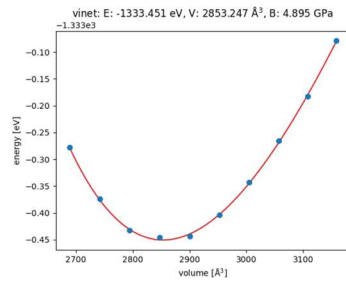**AWAREV\_full**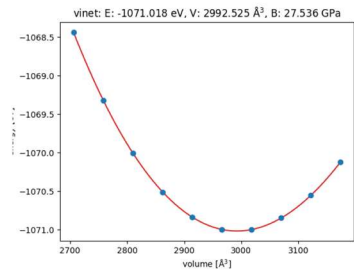**BIJZIG\_full**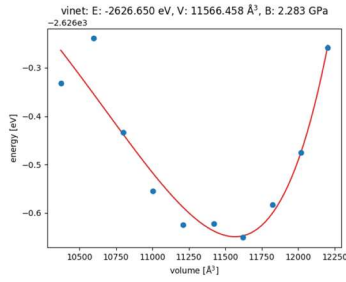**BODPUH\_full**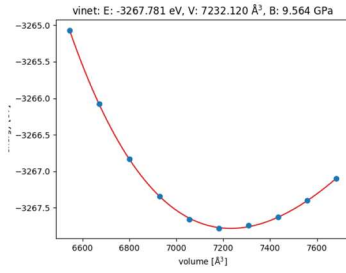**BOMCOX\_full**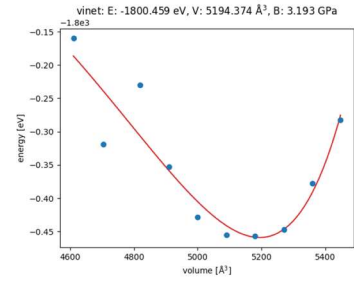**BUVWOF02\_full**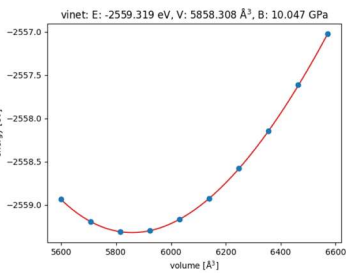**CAVVIH\_SL**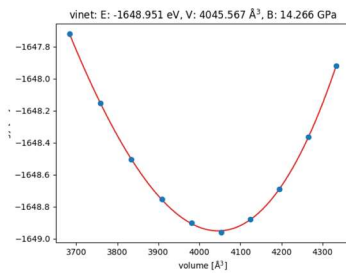**CETTUT\_full**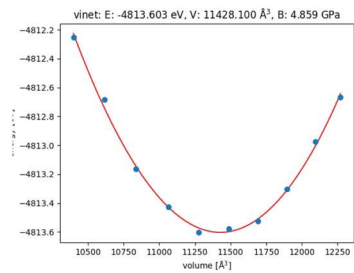**DAQMAN\_full**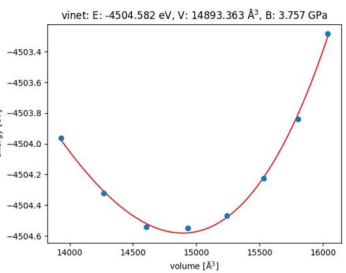**DORCIX02\_P1**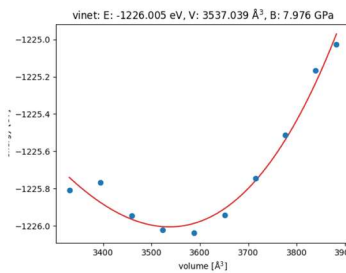**ECAHAT\_full**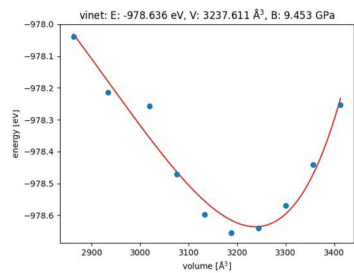**EGEJIK\_manual**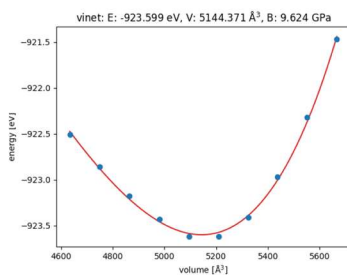**EGELUY01\_manual**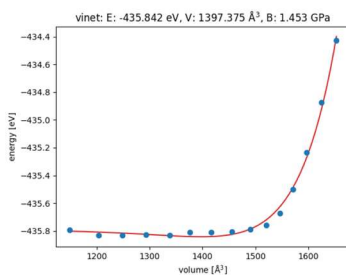**EHETERO2\_full**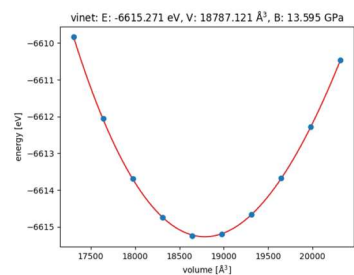

**ETEDEN\_full**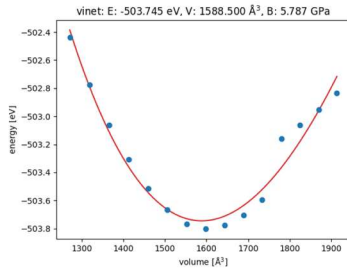**FAQDUA\_full**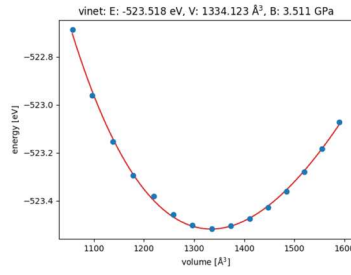**FERHAN\_full**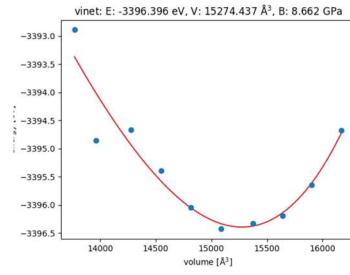**FUVFUZ\_full**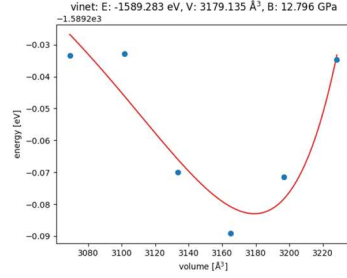**GITVIP01\_full**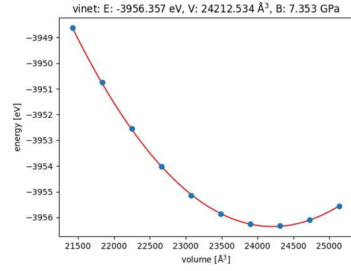**GOVSER\_full**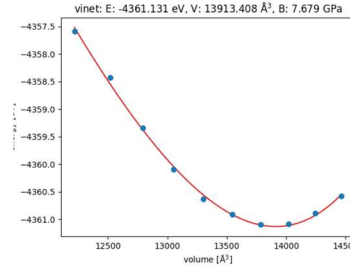**HAMXEC\_full**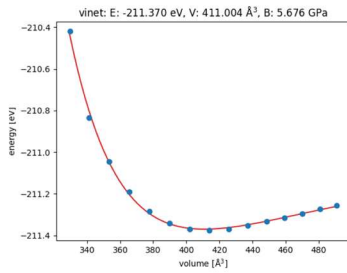**HIFVOI\_full**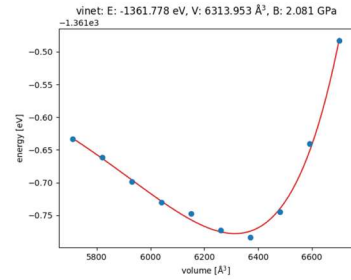**HONCEU\_P1**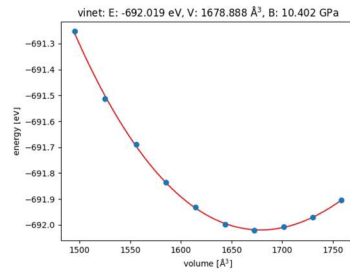**ICICAB\_P1**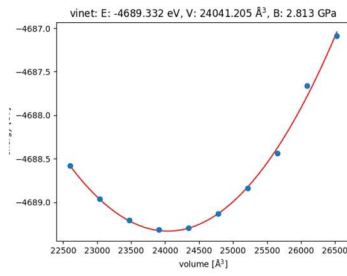**KULWAR\_full**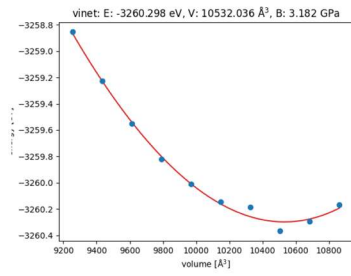**KUXSIH02\_P1**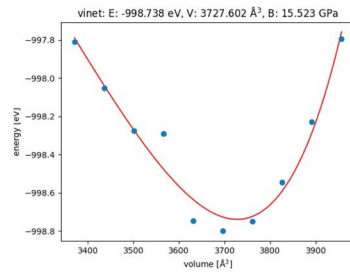**LARHUK\_full**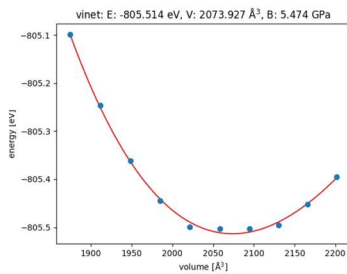**LEDBAB\_full**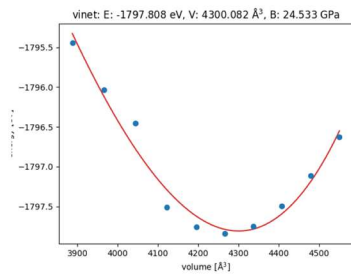**LEVPAF\_full**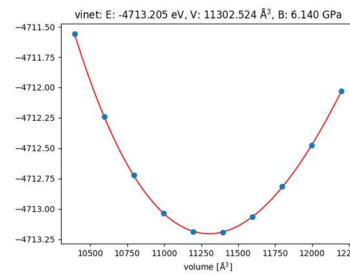

**MECWIB\_full**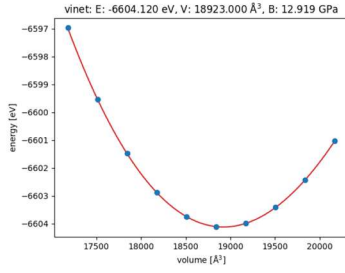**MUFTUD\_full**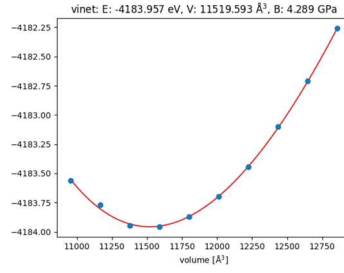**NEGTEB\_full**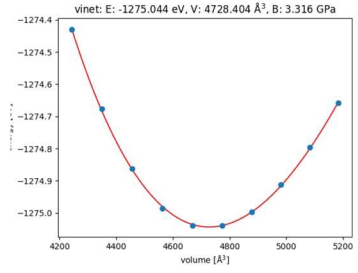**NOPGUY\_P1**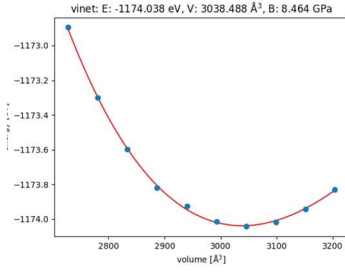**OPOQES\_full**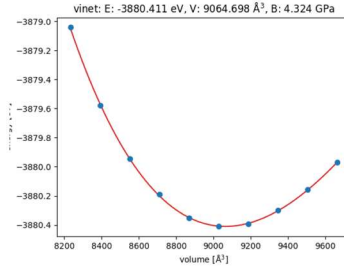**PERROW\_full**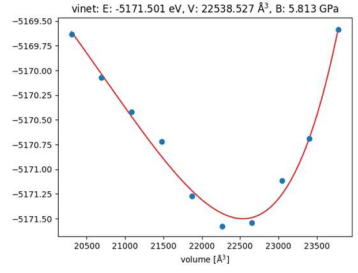**PETTAK\_full**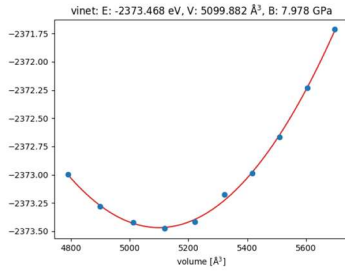**POGMOQ\_full**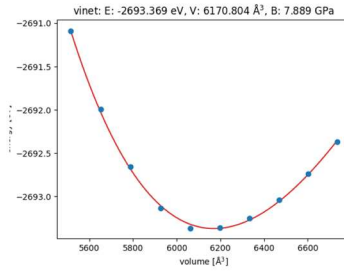**POKXIA\_full**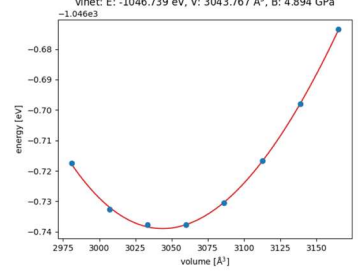**QAQTEJ\_full**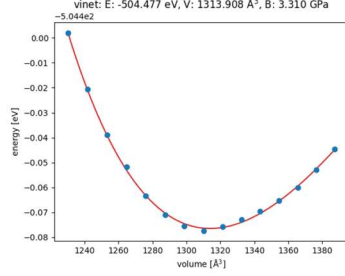**QUQPOI\_full**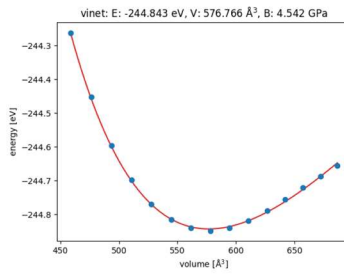**REBQIB\_full**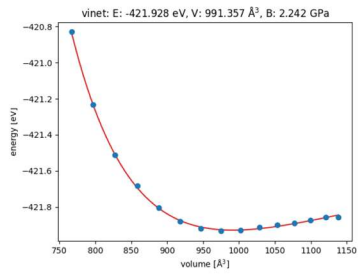**RETDZ\_full**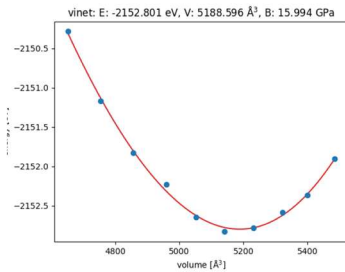**ROMFIM\_P1**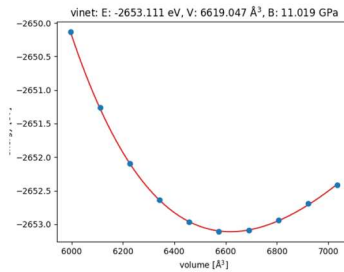**RUYGEZ\_full**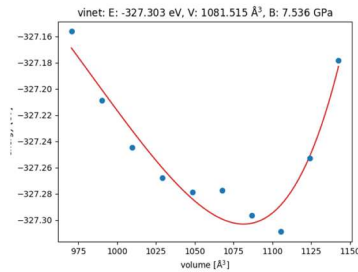

**SEFKOG\_full**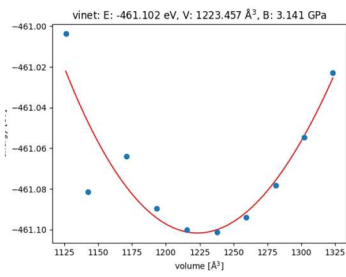**SEPNEJ\_full**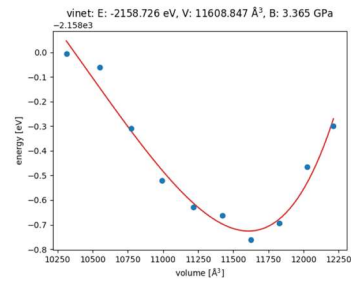**SETQEP\_clean**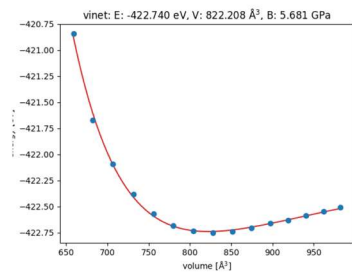**SIGNUU\_full**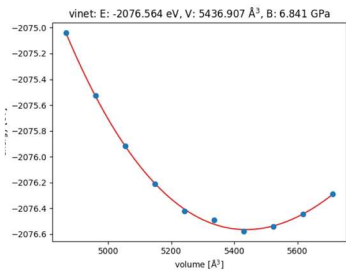**SODCAQ\_P1**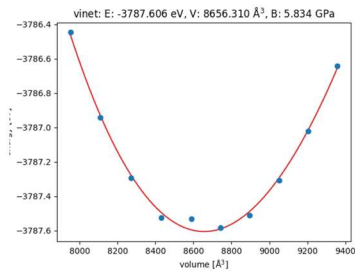**TENLOR\_full**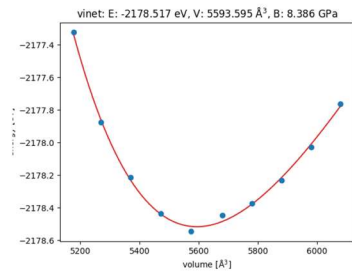**TENMAE\_full**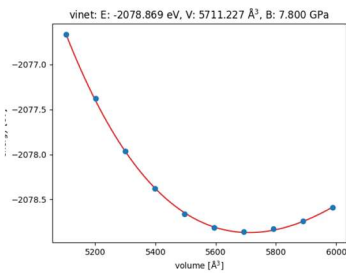**UQADEx\_full**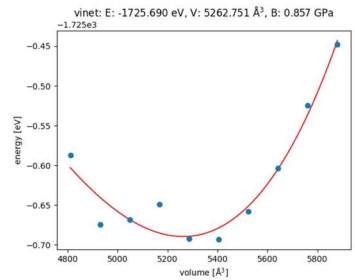**UVAPEN01\_full**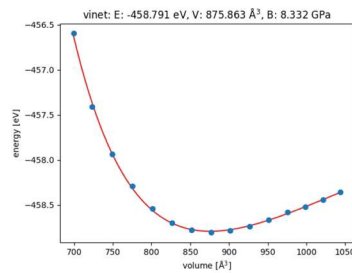**VEJYOZ\_full**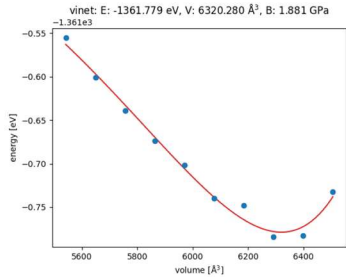**VIZRIH\_full**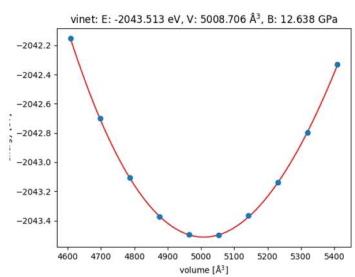**VOLQOD\_full**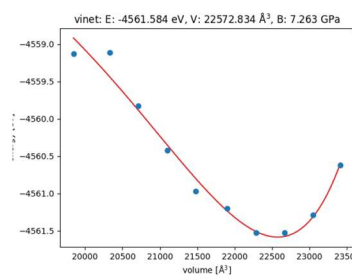**VUDTOH\_P1**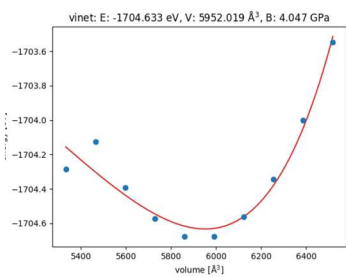**WAKHUO\_full**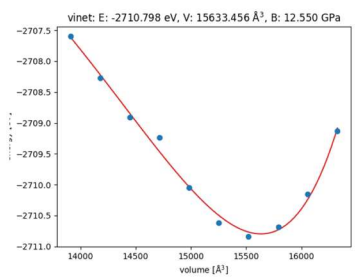**WORKUL\_full**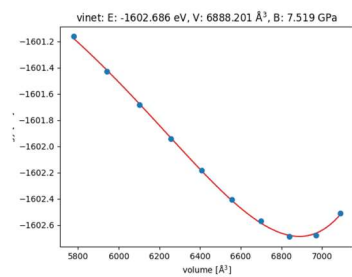

**WOSQAZ\_full**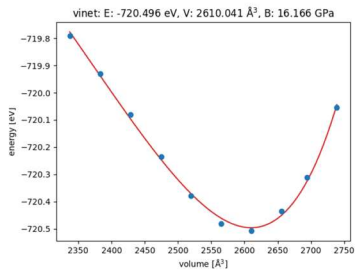**XADCOW\_P1**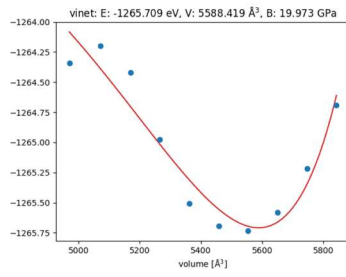**XEGXUF\_full**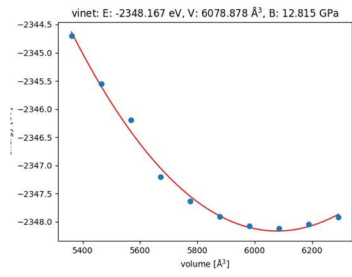**XOHLIS01\_full**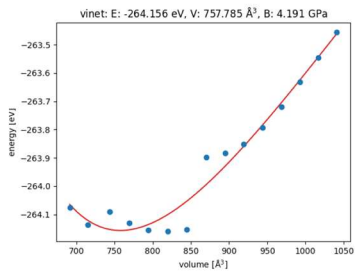**XOWJEB\_full**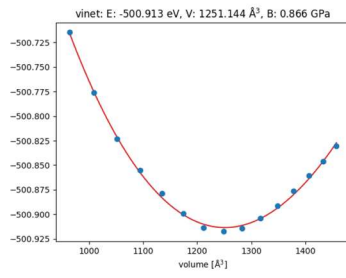**YAXBOP\_SL**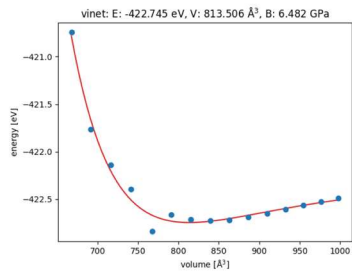**ZAVBUX\_full**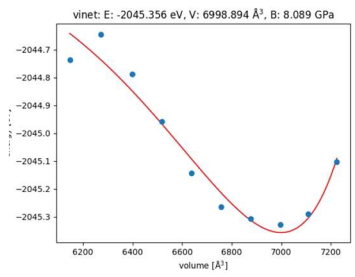**ZETLER\_full**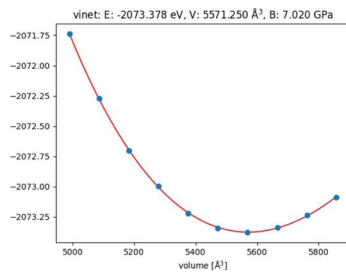**qmof-05dc5b6**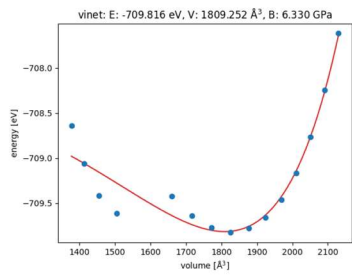**qmof-1985e04**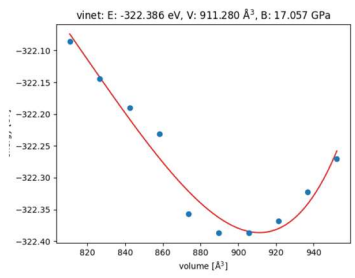**qmof-2f0e952**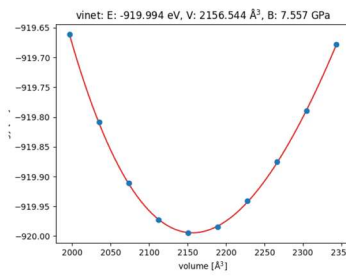**qmof-345d728**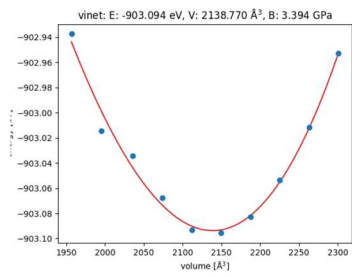**qmof-39fec9e**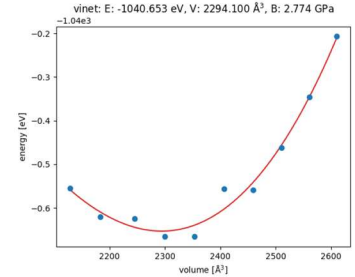**qmof-41f5a4b**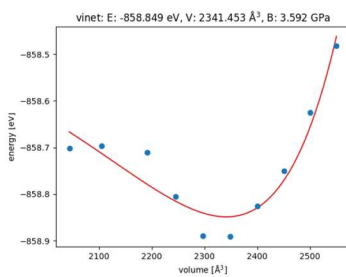**qmof-53872ef**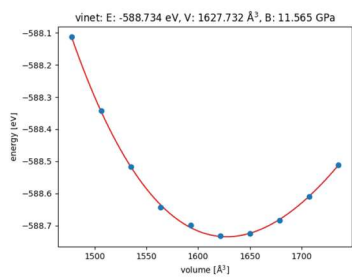

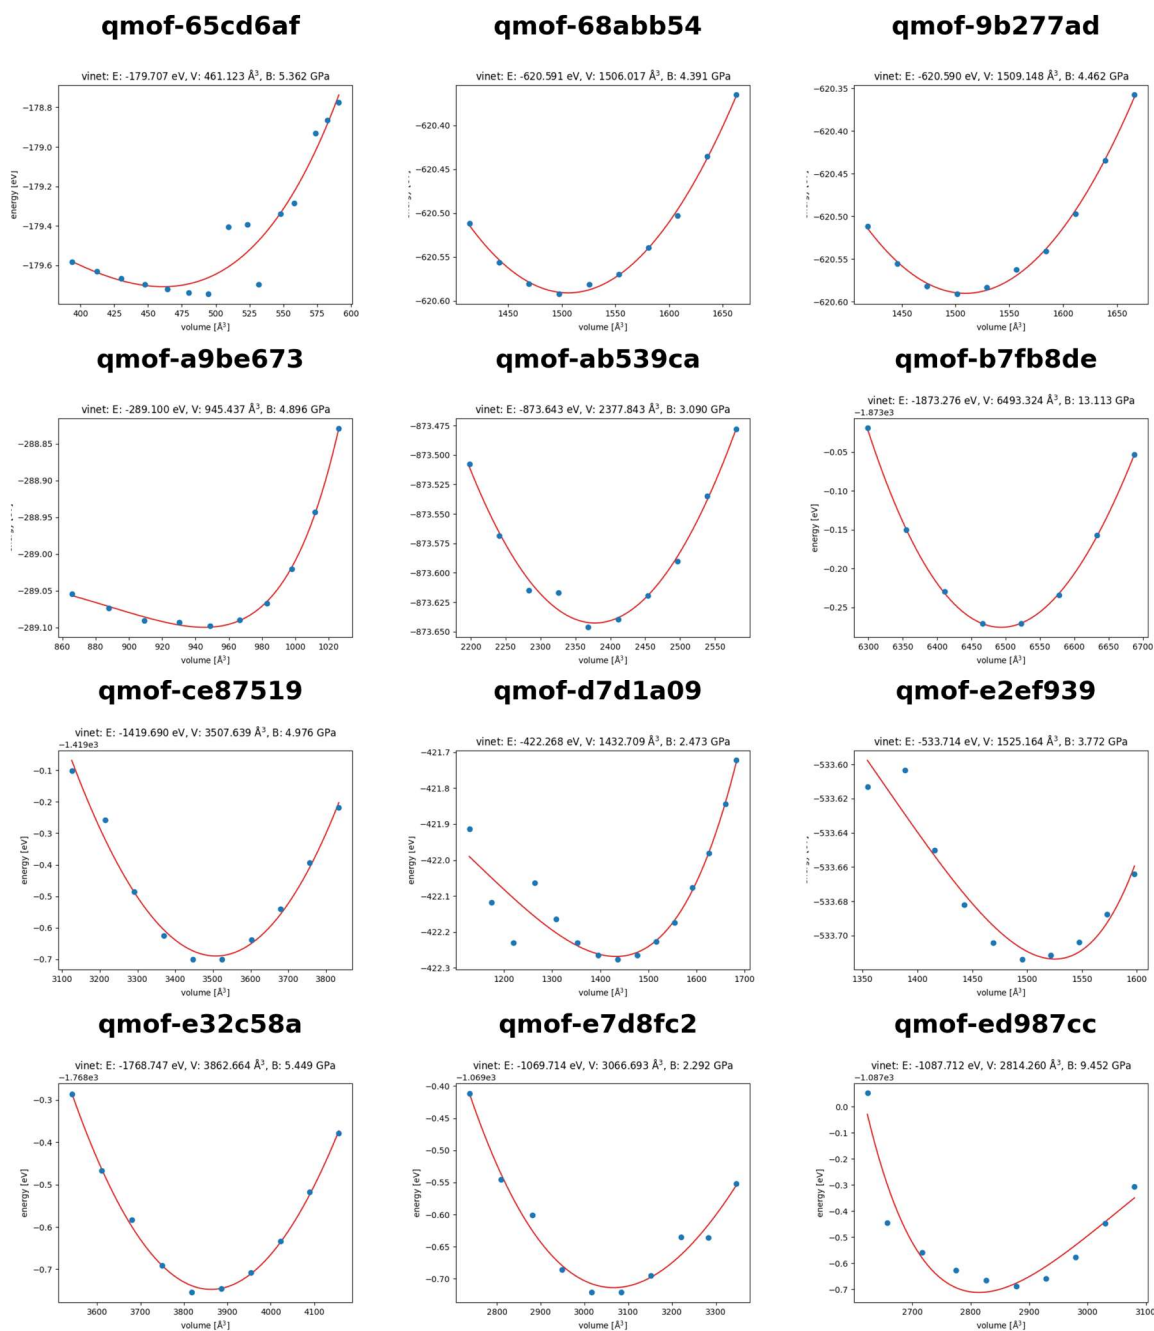

**Figure S8.** Energy-volume (E-V) curves utilized for the calculation of bulk moduli for the shortlisted MOFs. The blue markers represent the calculated data points, while the solid red lines indicate the corresponding fits using the Vinet equation of state (EOS). Each subplot is labeled with the respective MOF reference and the resulting bulk modulus (B) in GPa.

## References

- 1 M. Fischer, F. Hoffmann and M. Fröba, *ChemPhysChem*, 2010, **11**, 2220–2229.
- 2 J. Peng, Y. Sun, Y. Wu, Z. Lv and Z. Li, *Ind. Eng. Chem. Res.*, 2019, **58**, 8290–8295.

- 3 R. P. P. L. Ribeiro, B. C. R. Camacho, A. Lyubchyk, I. A. A. C. Esteves, F. J. A. L. Cruz and J. P. B. Mota, *Microporous and Mesoporous Materials*, 2016, **230**, 154–165.
- 4 S. Guo, H.-Z. Li, Z.-W. Wang, Z.-Y. Zhu, S.-H. Zhang, F. Wang and J. Zhang, *Inorg. Chem. Front.*, 2022, **9**, 2011–2015.
- 5 Y. Zhang, S. Deng, X. Cui, J. Yue, H. Huang, C. Xue, H. Yang and L. Gan, *Chem. Sci.*, 2025, **16**, 19381–19388.
